# Supplementary material for: ACYP2 polymorphisms are associated with the risk of liver cancer in a Han Chinese population
Source: PubMed Central journal article supplement (PMC5620206; doi:10.18632/oncotarget.18574), 2017-06-19
Supplement: oncotarget-08-67723-s001.pdf [file oncotarget-08-67723-s001.pdf]

## ACYP2 polymorphisms are associated with the risk of liver cancer in a Han Chinese population

### Supplementary Materials

**Supplementary Table 1: The PCR and UE primers of loci used in this study**

| SNP-ID     | 2nd-PCR                        | 1st-PCR                        | UEP-SEQ                   |
|------------|--------------------------------|--------------------------------|---------------------------|
| rs6713088  | ACGTTGGATGGTCACCAAAACACGTAATG  | ACGTTGGATGACACACACAGACTCCTCAC  | gaggeCAGAATGGTCCACTAGAGA  |
| rs12621038 | ACGTTGGATGGGCATAAAGTTTATTGCCTC | ACGTTGGATGATTGTGCTAGGCACTTAGG  | ccATTGCCTCAGCTAGACT       |
| rs1682111  | ACGTTGGATGGCCAGTGGGAATGCAAAATG | ACGTTGGATGGAATTGCTGGGTATTGGC   | tgteATGCAAAATGAAACAGACTT  |
| rs843752   | ACGTTGGATGGAGACAACATAATGGAGGTC | ACGTTGGATGTCCTCTTTTCAGAAACCTGC | cGAGTTTGGGTTGAGGT         |
| rs10439478 | ACGTTGGATGCTACACTCTCCAGAGGAATG | ACGTTGGATGTAGCACAAGACCTACACTGG | TTGCTGTTTCCCGAA           |
| rs17045754 | ACGTTGGATGGAAATCAGGGATATTAGTGC | ACGTTGGATGCTGTAAAAGTTCTGGCATGG | caggTATTCAGCTTCTAGAGTTA   |
| rs843720   | ACGTTGGATGAGTCAGAGCTAGACCTCTGG | ACGTTGGATGCTTCACAACACTCTGTAAG  | ccccAATCTGTCTCAGGGTCTT    |
| rs843645   | ACGTTGGATGACAGTGCCTTAGCAAGGTG  | ACGTTGGATGGAATCTGAATACCACCTAC  | TCATAGGCACTACTGTATC       |
| rs11125529 | ACGTTGGATGCCGAAGAAAAGAAGATGAC  | ACGTTGGATGGAGCTTAGTTGTTACAGATG | AGAAAAGAAGATGACTAAAACAT   |
| rs12615793 | ACGTTGGATGATCTTGGCCCTTGAAGAA   | ACGTTGGATGTTGAGCTTAGTTGTTAC    | AAATTGAGTGACAAATATAAACTAC |
| rs843711   | ACGTTGGATGTGCCTTGTGGGAATTAGAGC | ACGTTGGATGGACAAGGACCTTACAACCTC | gggaTCAGGGAACCAGTGCAA     |
| rs11896604 | ACGTTGGATGTGTCTCTGACCTAGCATGTA | ACGTTGGATGAAGTCAGAATAGTGCTTAC  | GTAAAGCTTGAAGGAG          |
| rs843706   | ACGTTGGATGTGAATAACTTGGTCTTATC  | ACGTTGGATGTGAAAGCCAATAAATTTTG  | cACTTGGTCTTAICTGATGC      |

SNP: Single nucleotide polymorphism; PCR: Polymerase chain reaction primer; UEP: unique base extension primer. Sequences are written in the 5'→3' (left to right) orientation.
